# Supplementary material
Source: PubMed Central journal article supplement (PMC1955777)
Supplement: pnas_0706517104_2.pdf [file pnas_0706517104_2.pdf]

IP: S6K1 S6K2

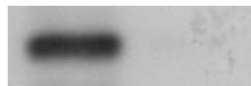

IB: S6K1

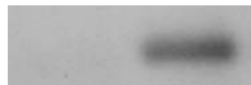

IB: S6K2

IP: S6K1 mTOR

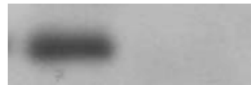

IB: S6K1

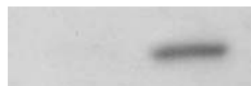

IB: mTOR

IP: S6K1 PKC

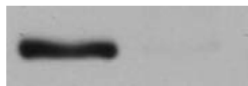

IB: S6K1

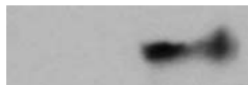

IB: PKC- $\delta$

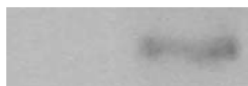

IB: PKC- $\theta$

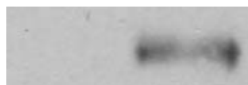

IB: PKC- $\zeta$

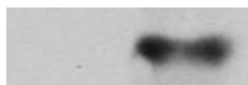

IB: PKC- $\gamma$
