# Supplementary material
Source: PubMed Central journal article supplement (PMC1955777)

**A**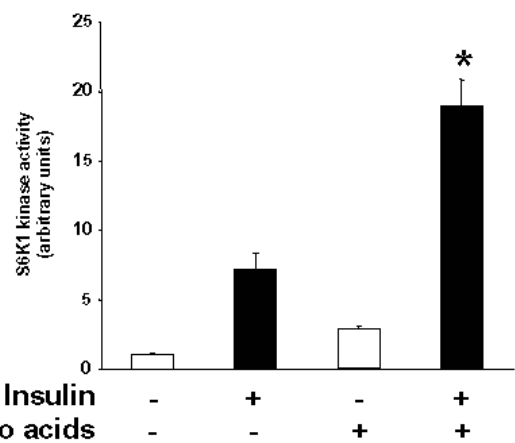**B**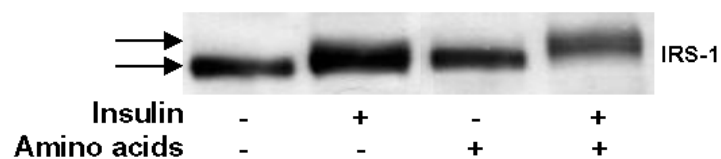**C**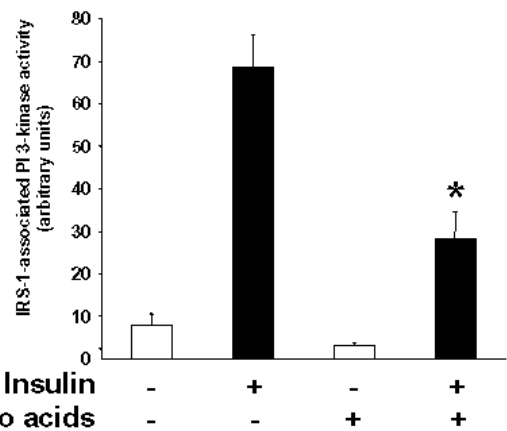**D**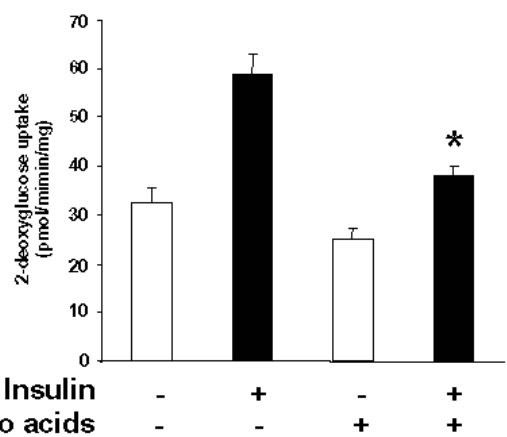**E**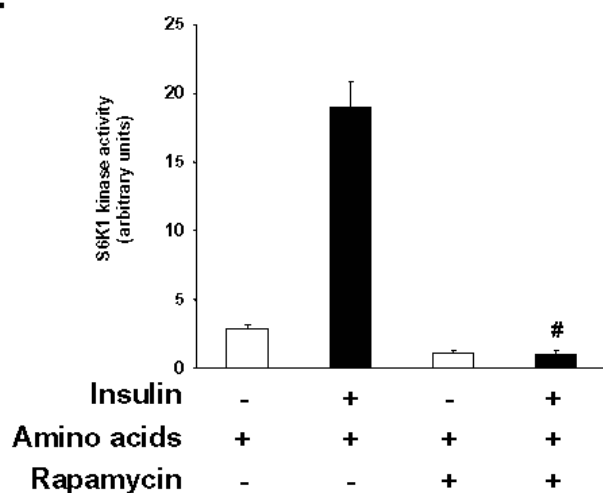**F**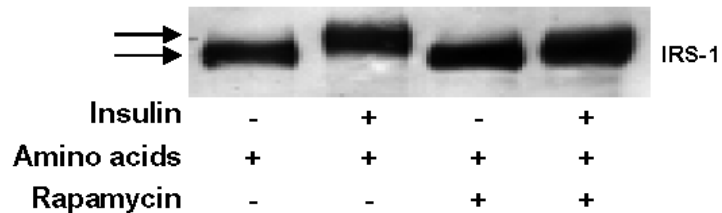**G**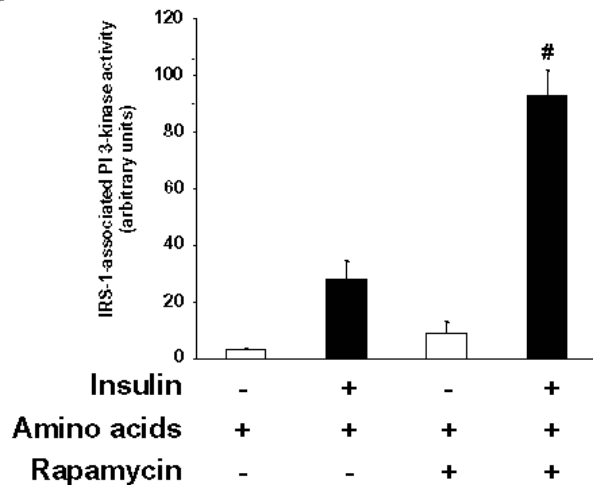**H**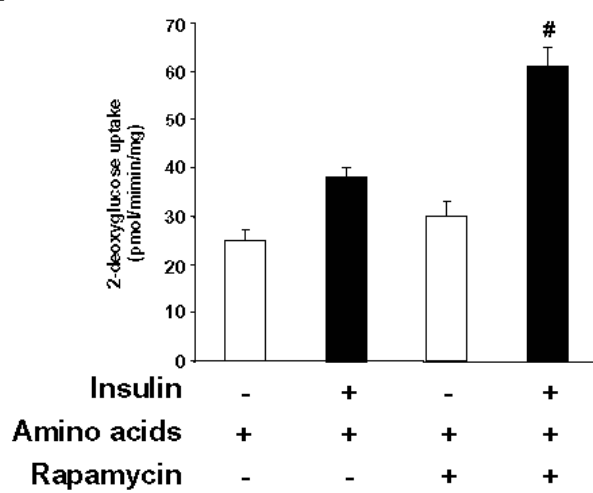

Supplement: pnas_0706517104_1.pdf [file pnas_0706517104_1.pdf]

**A**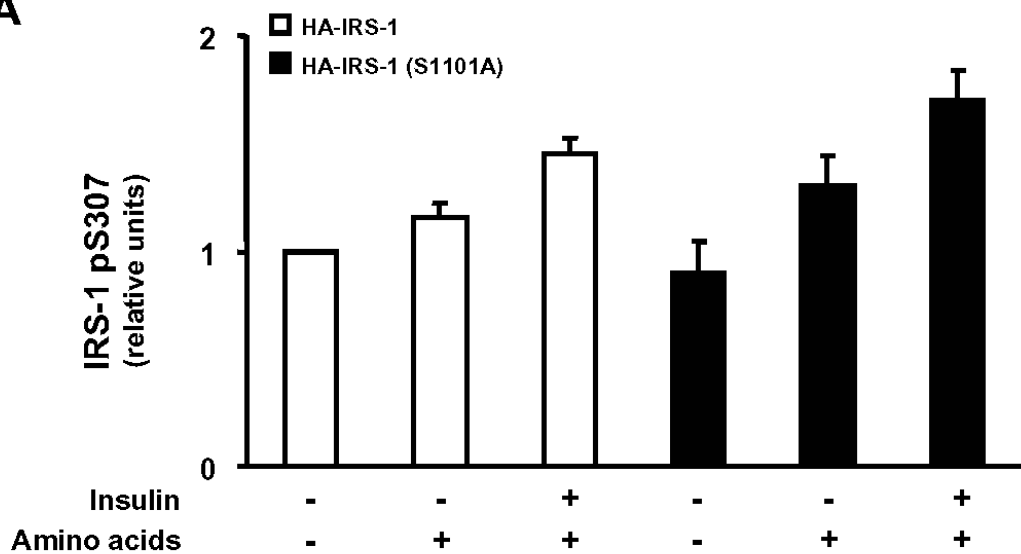**B**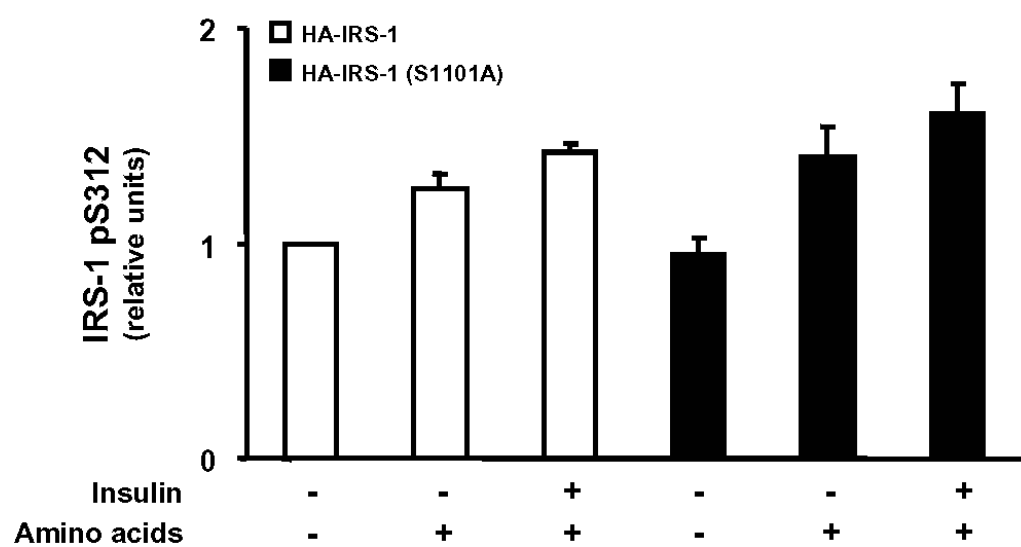**C**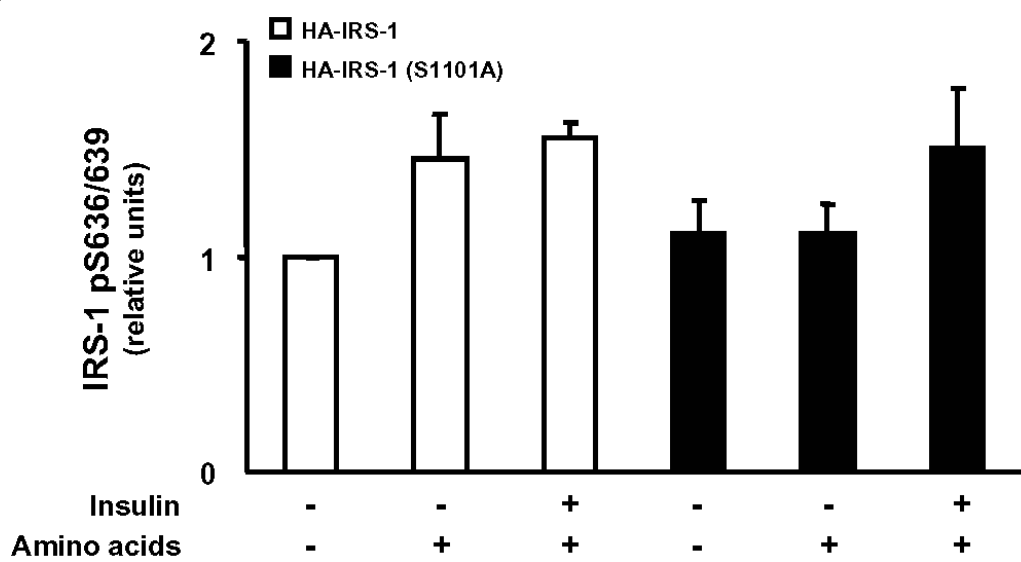

Supplement: pnas_0706517104_3.pdf [file pnas_0706517104_3.pdf]
